# Supplementary material for: Quantification of B16 Melanoma Cells in Lungs Using Triplex Q-PCR - A New Approach to Evaluate Melanoma Cell Metastasis and Tumor Control
Source: PubMed Central journal article supplement (PMC3909236; doi:10.1371/journal.pone.0087831), 2014-01-31

# Figure S1A

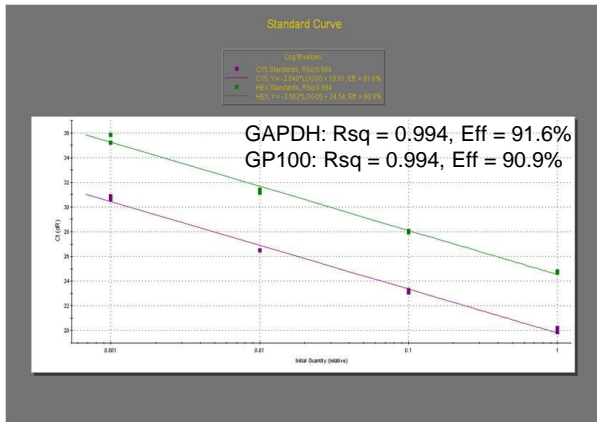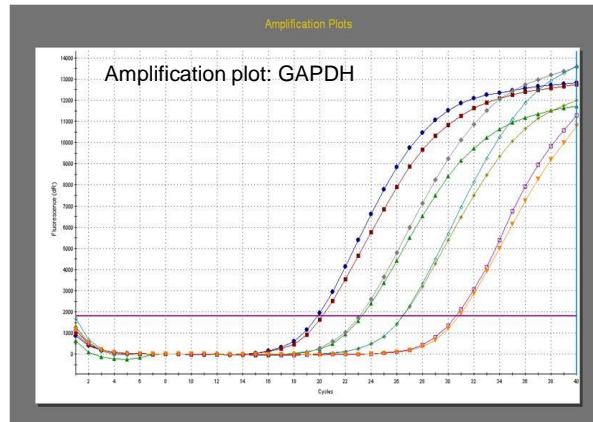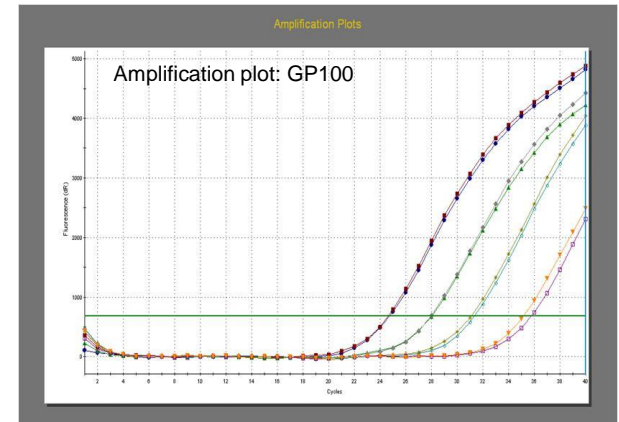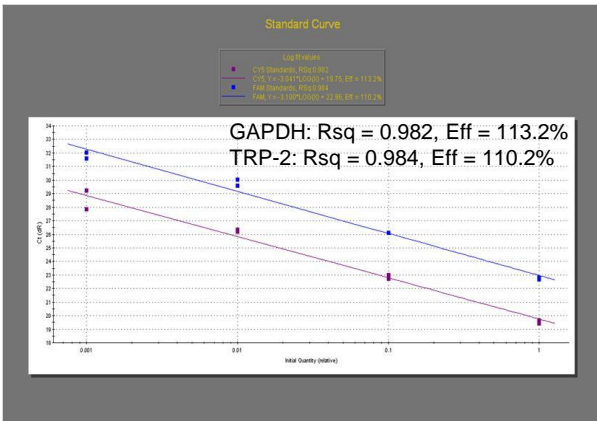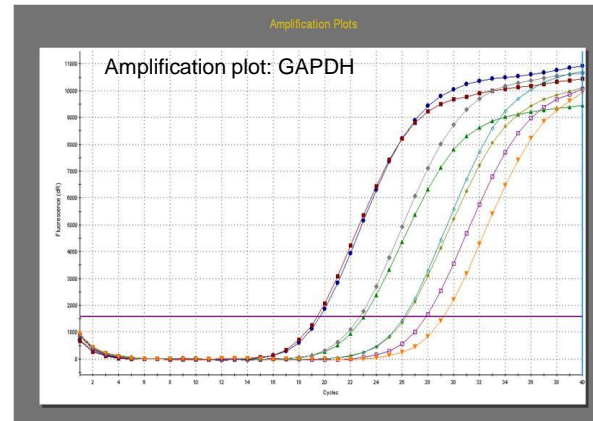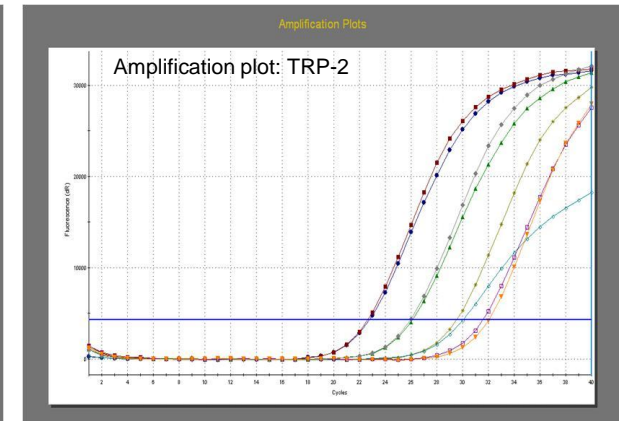

# Figure S1B

## Standard Curve

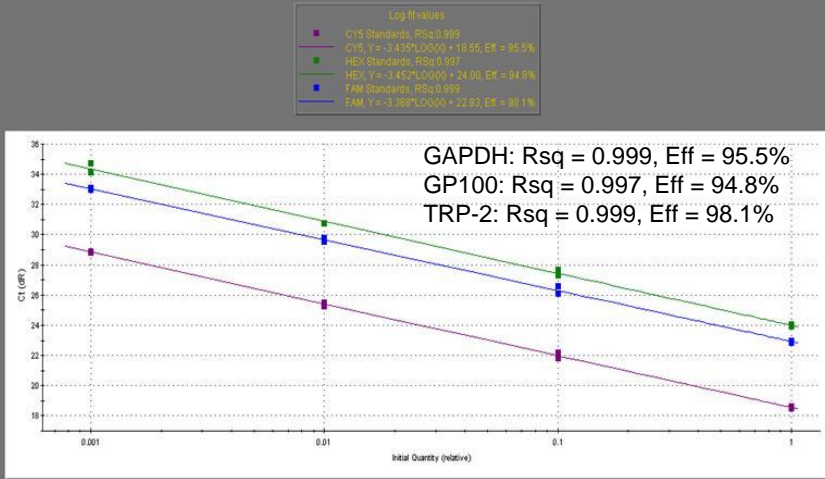

## Amplification Plots

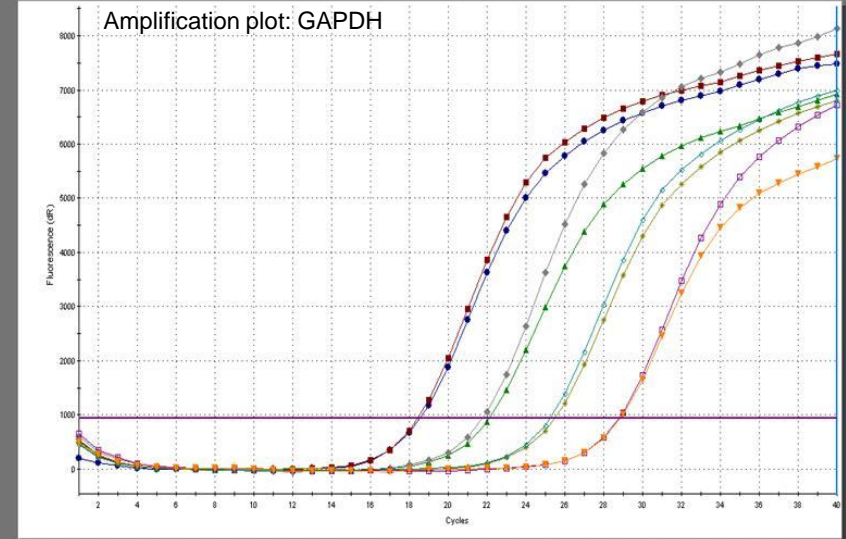

## Amplification Plots

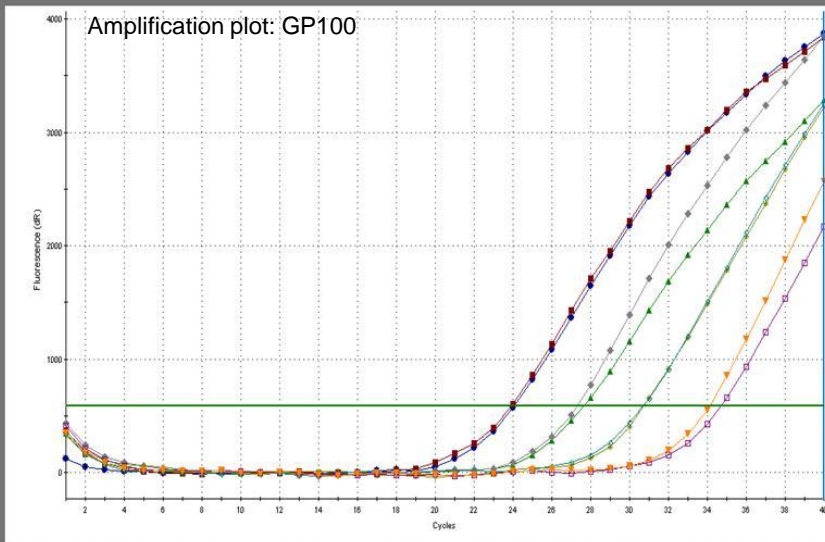

## Amplification Plots

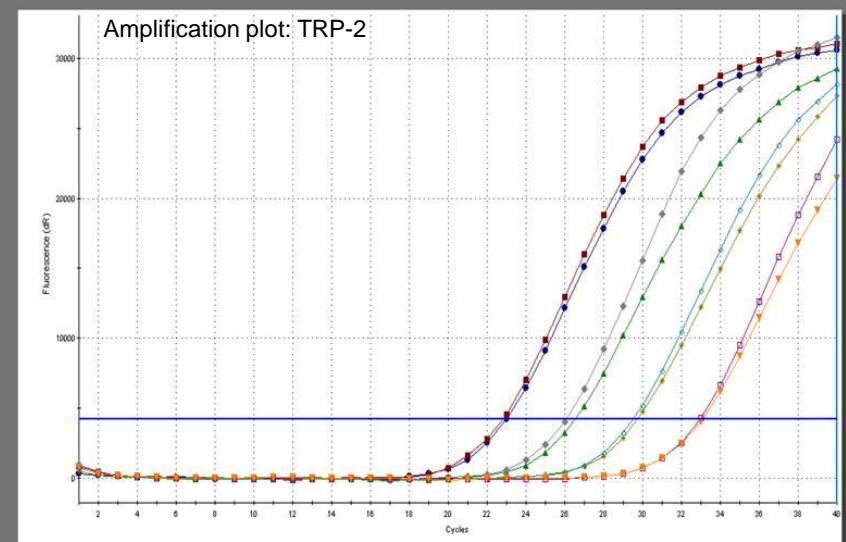

# Figure S1C

## Standard Curve

Log fit values:

|   |                                                           |
|---|-----------------------------------------------------------|
| ■ | CYS Standards, $Rsq=0.997$                                |
| ■ | CYS, $Y = -3.262 \cdot \log(X) + 18.43$ , $Eff = 102.6\%$ |
| ■ | HEK Standards, $Rsq=0.993$                                |
| ■ | HEK, $Y = -3.021 \cdot \log(X) + 20.91$ , $Eff = 98.8\%$  |
| ■ | FAM Standards, $Rsq=0.998$                                |
| ■ | FAM, $Y = -3.137 \cdot \log(X) + 20.72$ , $Eff = 103.7\%$ |

GAPDH:  $Rsq = 0.997$ ,  $Eff = 102.6\%$   
GP100:  $Rsq = 0.993$ ,  $Eff = 98.8\%$   
TRP-2:  $Rsq = 0.998$ ,  $Eff = 103.7\%$

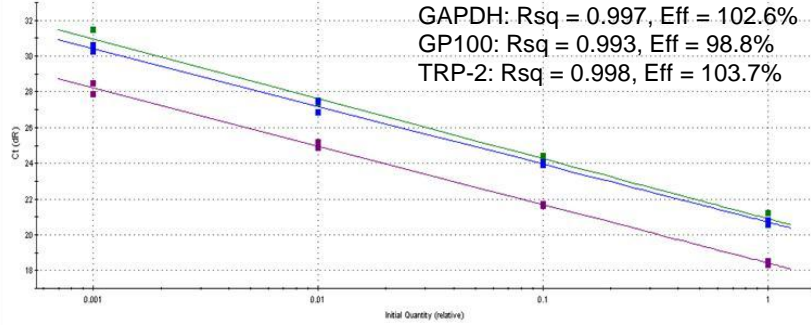

## Amplification Plots

### Amplification plot: GAPDH

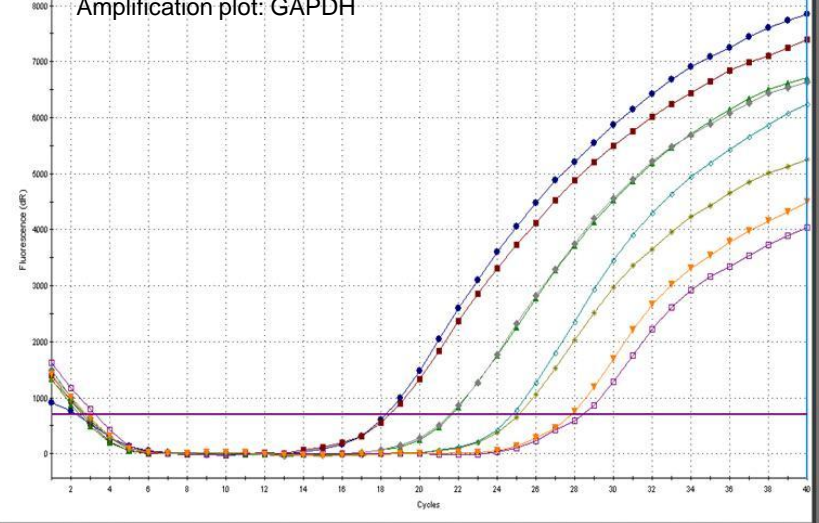

## Amplification Plots

### Amplification plot: GP100

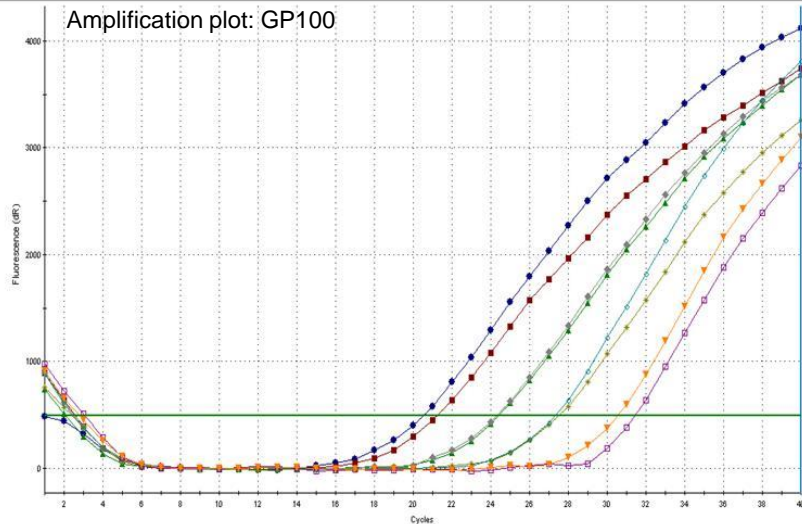

## Amplification Plots

### Amplification plot: TRP-2

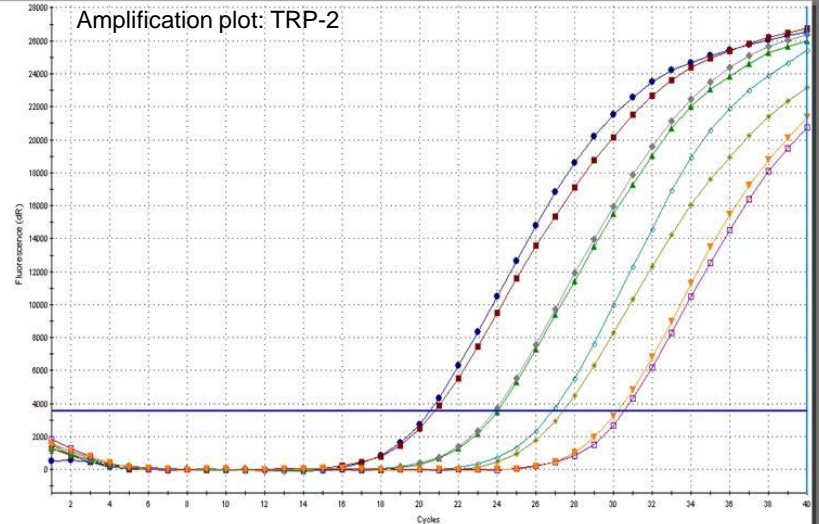

Supplement: pone.0087831.s001.pdf [file pone.0087831.s001.pdf]
